# Supplementary material for: Folic acid-conjugated temperature and pH dual-responsive yolk/shell microspheres as a drug delivery system
Source: Royal Society of Chemistry journal article supplement (doi:10.1039/c3tb20975j), 2013-01-01
Supplement: c3tb20975j.pdf [file c3tb20975j.pdf]

## Electronic Supplementary Information

# Folic acid-conjugated temperature and pH dual-responsive yolk/shell microspheres as drug delivery system

Pengcheng Du, Huiying Yang, Jin Zeng and Peng Liu\*

State Key Laboratory of Applied Organic Chemistry and Institute of Polymer Science  
and Engineering, College of Chemistry and Chemical Engineering, Lanzhou

University, Lanzhou 730000, People's Republic of China. Fax: 86 931 8912582; Tel:

86 931 8912582; E-mail: pliu@lzu.edu.cn

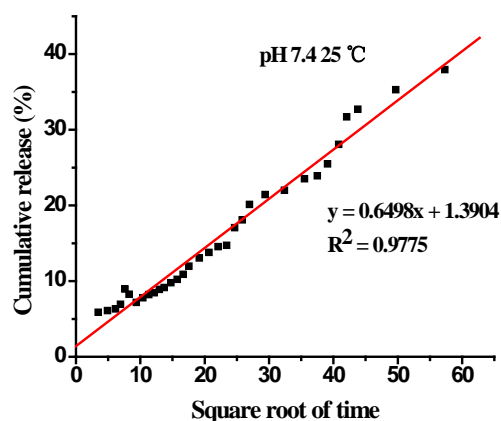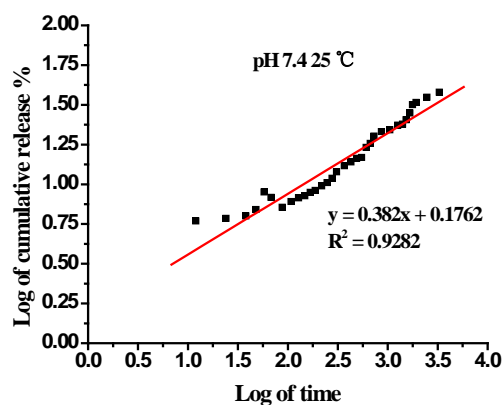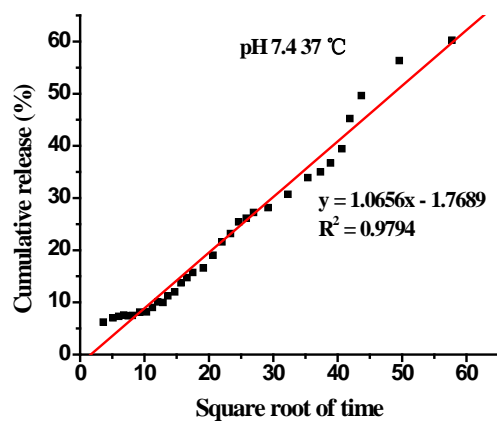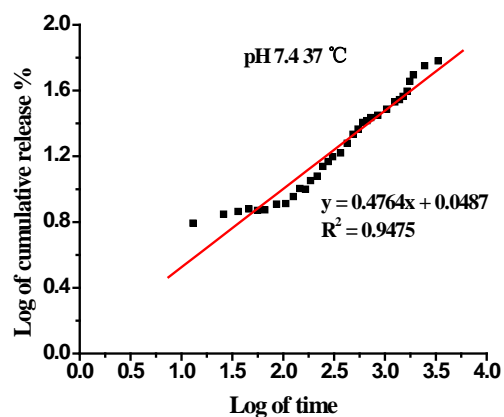

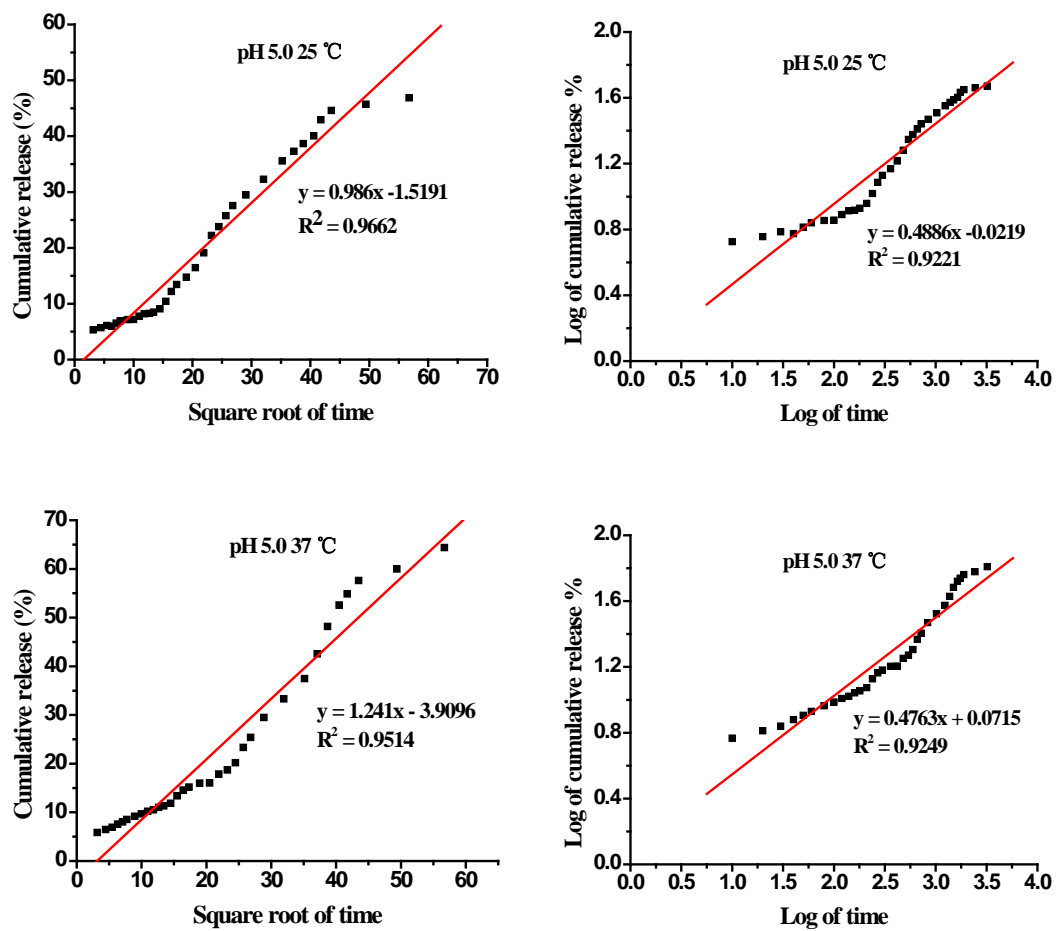

**Figure S1.** The curve of Higuchi and Korsmeyer-Peppas equation models mechanism of drug release.
